# Supplementary material
Source: Springer Nature journal article supplement (https://www.springerprofessional.de/resource/supplementary/13638_2013_852_MOESM8_ESM.pdf/11898610)

L2-SL0-CG

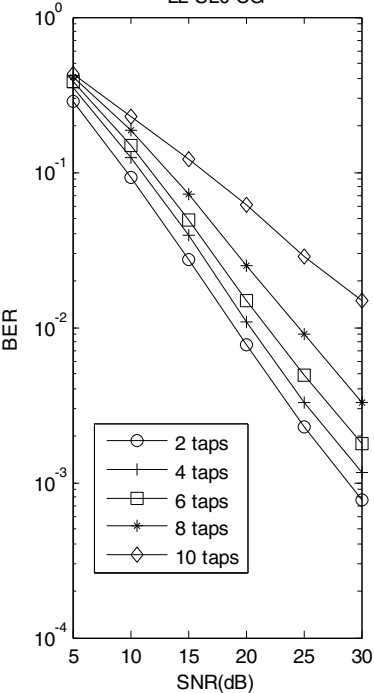

L2-SL0-BFGS

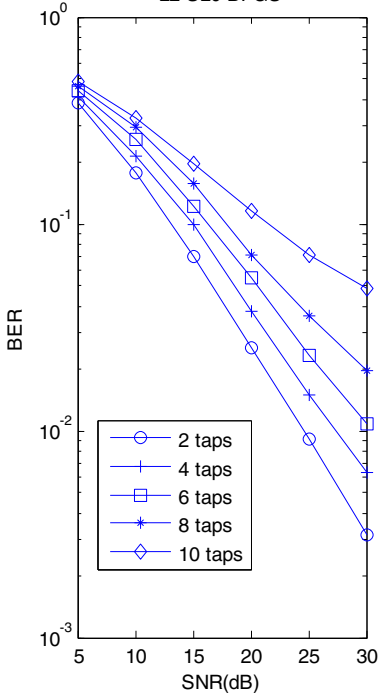

Supplement: MOESM8 [file 11898610]
